# Supplementary material for: Three diphosphates, α-Li2Na2P2O7, Li8Pb3Ba(P2O7)4and Li7Rb(P2O7)2: influences of co-substitution on the crystal structure
Source: Royal Society of Chemistry journal article supplement (doi:10.1039/d0dt01070g), 2020-01-01
Supplement: d0dt01070g1.pdf [file d0dt01070g1.pdf]

## Electronic Supplementary Information

### Three diphosphates, $\alpha$ -Li<sub>2</sub>Na<sub>2</sub>P<sub>2</sub>O<sub>7</sub>, Li<sub>8</sub>Pb<sub>3</sub>Ba(P<sub>2</sub>O<sub>7</sub>)<sub>4</sub> and Li<sub>7</sub>Rb(P<sub>2</sub>O<sub>7</sub>)<sub>2</sub>: Influences of the cosubstitution on the crystal structure

Ming Wen,<sup>a</sup> Cong Hu,<sup>b</sup> Hongping Wu,<sup>b</sup> Zihua Yang,<sup>b</sup> Xiaohong Wu,<sup>\*a</sup>  
and Shilie Pan<sup>\*ab</sup>

<sup>a</sup> *School of Chemistry and Chemical Engineering, Harbin Institute of Technology,  
Harbin Heilongjiang 150001, China.*

<sup>b</sup> *CAS Key Laboratory of Functional Materials and Devices for Special Environments,  
Xinjiang Technical Institute of Physics & Chemistry, CAS; Xinjiang Key Laboratory  
of Electronic Information Materials and Devices, 40-1 South Beijing Road, Urumqi  
830011, China.*

*E-mail: wuxiaohong@hit.edu.cn; slpan@ms.xjb.ac.cn*

## CONTENTS

|                                                                                                                                                                                                                                                                                                                                                                           |    |
|---------------------------------------------------------------------------------------------------------------------------------------------------------------------------------------------------------------------------------------------------------------------------------------------------------------------------------------------------------------------------|----|
| Table S1 Crystal data and structure refinements for $\alpha$ -Li <sub>2</sub> Na <sub>2</sub> P <sub>2</sub> O <sub>7</sub> , Li <sub>8</sub> Pb <sub>3</sub> Ba(P <sub>2</sub> O <sub>7</sub> ) <sub>4</sub> , and Li <sub>7</sub> Rb(P <sub>2</sub> O <sub>7</sub> ) <sub>2</sub> . .....                                                                               | 3  |
| Table S2 Atomic coordinates ( $\times 10^4$ ) and equivalent isotropic displacement parameters ( $\text{\AA}^2 \times 10^3$ ) for $\alpha$ -Li <sub>2</sub> Na <sub>2</sub> P <sub>2</sub> O <sub>7</sub> , Li <sub>8</sub> Pb <sub>3</sub> Ba(P <sub>2</sub> O <sub>7</sub> ) <sub>4</sub> , and Li <sub>7</sub> Rb(P <sub>2</sub> O <sub>7</sub> ) <sub>2</sub> . ..... | 4  |
| Table S3 Selected bond distances ( $\text{\AA}$ ) and angles (deg) for $\alpha$ -Li <sub>2</sub> Na <sub>2</sub> P <sub>2</sub> O <sub>7</sub> , Li <sub>8</sub> Pb <sub>3</sub> Ba(P <sub>2</sub> O <sub>7</sub> ) <sub>4</sub> , and Li <sub>7</sub> Rb(P <sub>2</sub> O <sub>7</sub> ) <sub>2</sub> . .....                                                            | 7  |
| Fig. S1 Experimental and calculated XRD patterns of (a) $\alpha$ -Li <sub>2</sub> Na <sub>2</sub> P <sub>2</sub> O <sub>7</sub> , (b) Li <sub>8</sub> Pb <sub>3</sub> Ba(P <sub>2</sub> O <sub>7</sub> ) <sub>4</sub> , and (c) Li <sub>7</sub> Rb(P <sub>2</sub> O <sub>7</sub> ) <sub>2</sub> . .....                                                                   | 13 |
| Fig. S2 TG-DSC curves of (a) $\alpha$ -Li <sub>2</sub> Na <sub>2</sub> P <sub>2</sub> O <sub>7</sub> , (b) Li <sub>8</sub> Pb <sub>3</sub> Ba(P <sub>2</sub> O <sub>7</sub> ) <sub>4</sub> , and (c) Li <sub>7</sub> Rb(P <sub>2</sub> O <sub>7</sub> ) <sub>2</sub> . .....                                                                                              | 14 |
| Fig. S3 IR spectra of (a) $\alpha$ -Li <sub>2</sub> Na <sub>2</sub> P <sub>2</sub> O <sub>7</sub> , (b) Li <sub>8</sub> Pb <sub>3</sub> Ba(P <sub>2</sub> O <sub>7</sub> ) <sub>4</sub> , and (c) Li <sub>7</sub> Rb(P <sub>2</sub> O <sub>7</sub> ) <sub>2</sub> . .....                                                                                                 | 15 |
| Fig. S4 Band structures of (a) $\alpha$ -Li <sub>2</sub> Na <sub>2</sub> P <sub>2</sub> O <sub>7</sub> , and (b) Li <sub>8</sub> Pb <sub>3</sub> Ba(P <sub>2</sub> O <sub>7</sub> ) <sub>4</sub> . .....                                                                                                                                                                  | 16 |
| Fig. S5 Projected density of states of (a) $\alpha$ -Li <sub>2</sub> Na <sub>2</sub> P <sub>2</sub> O <sub>7</sub> , and (b) Li <sub>8</sub> Pb <sub>3</sub> Ba(P <sub>2</sub> O <sub>7</sub> ) <sub>4</sub> . .....                                                                                                                                                      | 17 |

**Table S1.** Crystal data and structure refinements for  $\alpha$ -Li<sub>2</sub>Na<sub>2</sub>P<sub>2</sub>O<sub>7</sub>, Li<sub>8</sub>Pb<sub>3</sub>Ba(P<sub>2</sub>O<sub>7</sub>)<sub>4</sub>, and Li<sub>7</sub>Rb(P<sub>2</sub>O<sub>7</sub>)<sub>2</sub>.

| Empirical formula                                                                     | $\alpha$ -Li <sub>2</sub> Na <sub>2</sub> P <sub>2</sub> O <sub>7</sub> | Li <sub>8</sub> Pb <sub>3</sub> BaP <sub>8</sub> O <sub>28</sub> | Li <sub>7</sub> RbP <sub>4</sub> O <sub>14</sub>     |
|---------------------------------------------------------------------------------------|-------------------------------------------------------------------------|------------------------------------------------------------------|------------------------------------------------------|
| Temperature                                                                           |                                                                         | 296(2) K                                                         |                                                      |
| Wavelength                                                                            |                                                                         | 0.71073 Å                                                        |                                                      |
| Crystal system                                                                        | Orthorhombic                                                            | Monoclinic                                                       | Triclinic                                            |
| Space group                                                                           | <i>Ama</i> 2                                                            | <i>C</i> 2/ <i>c</i>                                             | <i>P</i> $\bar{1}$                                   |
| Formula weight                                                                        | 233.80                                                                  | 1510.19                                                          | 459.33                                               |
| <i>a</i> (Å)                                                                          | 13.272(9)                                                               | 25.650(4)                                                        | 5.002(4), $\alpha=105.117^\circ$                     |
| <i>b</i> (Å)                                                                          | 9.007(8)                                                                | 9.976(13), $\beta=111.33^\circ$                                  | 6.844(8), $\beta=102.037^\circ$                      |
| <i>c</i> (Å)                                                                          | 5.040(3)                                                                | 9.925 (13)                                                       | 9.981(9), $\gamma=102.040^\circ$                     |
| Z, Volume (Å <sup>3</sup> )                                                           | 4, 602.5(8)                                                             | 4, 2390.8(6)                                                     | 4, 309.9(5)                                          |
| $\rho_{\text{Calcd}}$ (Mg/m <sup>3</sup> )                                            | 2.577                                                                   | 4.196                                                            | 4.586                                                |
| $\mu$ (/mm)                                                                           | 0.852                                                                   | 23.349                                                           | 25.0                                                 |
| F(000)                                                                                | 456                                                                     | 2680                                                             | 230                                                  |
| R(int)                                                                                | 0.0508                                                                  | 0.0336                                                           | 0.0245                                               |
| Goodness-of-fit on F <sup>2</sup>                                                     | 1.076                                                                   | 1.066                                                            | 1.038                                                |
| Final R indices                                                                       | R <sub>1</sub> = 0.0386,                                                | R <sub>1</sub> = 0.0386                                          | R <sub>1</sub> = 0.0417                              |
| [F <sub>o</sub> <sup>2</sup> >2 $\sigma$ (F <sub>o</sub> <sup>2</sup> )] <sup>a</sup> | wR <sub>2</sub> = 0.0848                                                | wR <sub>2</sub> = 0.0839                                         | wR <sub>2</sub> = 0.0908                             |
| R indices (all data) <sup>a</sup>                                                     | R <sub>1</sub> = 0.0436,<br>wR <sub>2</sub> = 0.0877                    | R <sub>1</sub> = 0.0466,<br>wR <sub>2</sub> = 0.0876             | R <sub>1</sub> = 0.0519,<br>wR <sub>2</sub> = 0.0966 |
| Largest diff. peak and hole (e <sup>-</sup> Å <sup>-3</sup> )                         | 0.4 and -0.4                                                            | 3.3 and -4.8                                                     | 0.5 and -0.7                                         |

$$^a R_1 = \frac{\sum ||F_o| - |F_c||}{\sum |F_o|} \text{ and } wR_2 = \left[ \frac{\sum w(F_o^2 - F_c^2)^2}{\sum w F_o^4} \right]^{1/2} \text{ for } F_o^2 > 2\sigma(F_o^2)$$

**Table S2a.** Atomic coordinates ( $\times 10^4$ ) and equivalent isotropic displacement parameters ( $\text{\AA}^2 \times 10^3$ ) for  $\alpha\text{-Li}_2\text{Na}_2\text{P}_2\text{O}_7$ .  $U_{\text{eq}}$  is defined as one-third of the trace of the orthogonalized  $U_{ij}$  tensor.

| Atom  | x       | y       | z        | U(eq) |
|-------|---------|---------|----------|-------|
| Li(1) | 5800(7) | 7153(8) | 4630(20) | 16(2) |
| Na(1) | 7500    | 5429(3) | -110(8)  | 17(1) |
| Na(2) | 5000    | 5000    | 10105(7) | 20(1) |
| P(1)  | 6384(1) | 3793(1) | 4729(3)  | 8(1)  |
| O(1)  | 6300(3) | 3873(4) | 7710(8)  | 12(1) |
| O(2)  | 6311(3) | 5297(4) | 3411(8)  | 13(1) |
| O(3)  | 5682(3) | 2658(4) | 3483(8)  | 13(1) |
| O(4)  | 7500    | 3134(5) | 4027(10) | 10(1) |

**Table S2b.** Atomic coordinates ( $\times 10^4$ ) and equivalent isotropic displacement parameters ( $\text{\AA}^2 \times 10^3$ ) for  $\text{Li}_8\text{Pb}_3\text{Ba}(\text{P}_2\text{O}_7)_4$ .  $U_{\text{eq}}$  is defined as one-third of the trace of the orthogonalized  $U_{ij}$  tensor.

| Atom  | x       | y         | z        | U(eq) |
|-------|---------|-----------|----------|-------|
| Pb(1) | 5000    | 5583(1)   | 7500     | 7(1)  |
| Pb(2) | 2669(1) | 12149(1)  | 3192(1)  | 22(1) |
| Ba(1) | 5000    | 9832(1)   | 7500     | 12(1) |
| P(1)  | 4424(1) | 6985(2)   | 3966(2)  | 5(1)  |
| P(2)  | 2078(1) | 9529(2)   | 4737(2)  | 4(1)  |
| P(3)  | 5595(1) | 7527(2)   | 5439(2)  | 3(1)  |
| P(4)  | 3253(1) | 9873(2)   | 6131(3)  | 5(1)  |
| Li(1) | 6099(7) | 10304(17) | 5827(19) | 11(3) |
| Li(2) | 3613(7) | 4744(18)  | 3298(19) | 13(3) |
| Li(3) | 3662(7) | 2929(19)  | 6250(18) | 11(3) |
| Li(4) | 3856(7) | 7344(18)  | 6316(18) | 10(3) |
| O(1)  | 5542(3) | 8968(7)   | 4986(8)  | 12(2) |
| O(2)  | 2716(3) | 9116(7)   | 5046(7)  | 5(1)  |
| O(3)  | 5086(3) | 6729(7)   | 4289(7)  | 7(1)  |
| O(4)  | 2036(3) | 10999(7)  | 4326(8)  | 10(1) |
| O(5)  | 4148(3) | 5922(7)   | 2864(7)  | 10(1) |
| O(6)  | 3242(3) | 9644(8)   | 7639(7)  | 11(1) |
| O(7)  | 4293(3) | 8386(7)   | 3387(8)  | 14(2) |
| O(8)  | 6108(3) | 6812(7)   | 5394(7)  | 9(1)  |
| O(9)  | 4335(3) | 6740(8)   | 5383(8)  | 13(2) |
| O(10) | 3740(3) | 9203(7)   | 5881(7)  | 8(1)  |
| O(11) | 1755(3) | 8652(7)   | 3491(7)  | 8(1)  |
| O(12) | 5512(3) | 7378(7)   | 6887(7)  | 8(1)  |
| O(13) | 1961(3) | 9292(8)   | 6116(7)  | 13(2) |
| O(14) | 3186(3) | 11341(7)  | 5706(8)  | 14(2) |

**Table S2c.** Atomic coordinates ( $\times 10^4$ ) and equivalent isotropic displacement parameters ( $\text{\AA}^2 \times 10^3$ ) for  $\text{Li}_7\text{Rb}(\text{P}_2\text{O}_7)_2$ .  $U_{\text{eq}}$  is defined as one-third of the trace of the orthogonalized  $U_{ij}$  tensor.

| Atom  | x         | y         | z         | U(eq) |
|-------|-----------|-----------|-----------|-------|
| Rb(1) | 10000     | 5000      | 5000      | 28(1) |
| Li(1) | 8837(15)  | 10053(11) | 6122(7)   | 16(2) |
| Li(2) | 6150(30)  | 1660(30)  | -292(16)  | 20(3) |
| Li(3) | -2970(30) | 4240(30)  | 327(15)   | 21(3) |
| Li(4) | 9140(30)  | 6170(20)  | 1092(14)  | 11(2) |
| Li(5) | 3330(30)  | 140(20)   | -1167(15) | 19(3) |
| Li(6) | 9720(30)  | 8230(20)  | 1368(16)  | 21(3) |
| P(1)  | 2121(2)   | 2582(2)   | 1687(1)   | 8(1)  |
| P(2)  | 5049(2)   | 7048(2)   | 2872(1)   | 9(1)  |
| O(1)  | 4308(6)   | 4662(4)   | 2956(3)   | 13(1) |
| O(2)  | 7526(6)   | 8279(4)   | 4180(3)   | 14(1) |
| O(3)  | 269(6)    | 3362(5)   | 643(3)    | 15(1) |
| O(4)  | 5890(6)   | 6922(5)   | 1475(3)   | 16(1) |
| O(5)  | 2373(6)   | 7726(5)   | 2857(3)   | 19(1) |
| O(6)  | 453(6)    | 1417(5)   | 2469(3)   | 19(1) |
| O(7)  | 3940(7)   | 1407(5)   | 965(3)    | 22(1) |

**Table S3a.** Selected bond distances (Å) and angles (deg) for  $\alpha$ -Li<sub>2</sub>Na<sub>2</sub>P<sub>2</sub>O<sub>7</sub>.

|                     |            |                       |            |
|---------------------|------------|-----------------------|------------|
| Li(1)-O(2)          | 1.906(9)   | O(1)#4-Na(1)-O(4)     | 85.06(14)  |
| Li(1)-O(1)#1        | 1.944(10)  | O(1)#8-Na(1)-O(4)     | 85.06(14)  |
| Li(1)-O(3)#2        | 1.999(12)  | O(4)#1-Na(1)-O(4)     | 144.9(2)   |
| Li(1)-O(3)#3        | 2.057(10)  | O(1)#3-Na(2)-O(1)     | 117.8(3)   |
| Na(1)-O(2)#7        | 2.378(5)   | O(1)#3-Na(2)-O(2)#10  | 146.82(14) |
| Na(1)-O(2)          | 2.378(5)   | O(1)-Na(2)-O(2)#10    | 82.71(14)  |
| Na(1)-O(1)#4        | 2.389(5)   | O(1)#3-Na(2)-O(2)#11  | 82.71(14)  |
| Na(1)-O(1)#8        | 2.389(5)   | O(1)-Na(2)-O(2)#11    | 146.82(14) |
| Na(1)-O(4)#1        | 2.475(6)   | O(2)#10-Na(2)-O(2)#11 | 93.1(2)    |
| Na(1)-O(4)          | 2.936(6)   | O(1)#3-Na(2)-O(3)#12  | 88.91(15)  |
| Na(2)-O(1)#3        | 2.338(4)   | O(1)-Na(2)-O(3)#12    | 72.82(13)  |
| Na(2)-O(1)          | 2.338(4)   | O(2)#10-Na(2)-O(3)#12 | 123.32(13) |
| Na(2)-O(2)#10       | 2.424(5)   | O(2)#11-Na(2)-O(3)#12 | 82.48(13)  |
| Na(2)-O(2)#11       | 2.424(5)   | O(1)#3-Na(2)-O(3)#2   | 72.82(13)  |
| Na(2)-O(3)#12       | 2.687(4)   | O(1)-Na(2)-O(3)#2     | 88.91(15)  |
| Na(2)-O(3)#2        | 2.687(4)   | O(2)#10-Na(2)-O(3)#2  | 82.48(13)  |
| P(1)-O(1)           | 1.508(4)   | O(2)#11-Na(2)-O(3)#2  | 123.32(13) |
| P(1)-O(2)           | 1.511(4)   | O(3)#12-Na(2)-O(3)#2  | 144.6(2)   |
| P(1)-O(3)           | 1.519(4)   | O(1)#3-Na(2)-O(3)#11  | 75.72(13)  |
| P(1)-O(4)           | 1.635(2)   | O(1)-Na(2)-O(3)#11    | 149.53(12) |
| O(2)-Li(1)-O(1)#1   | 114.6(5)   | O(2)#10-Na(2)-O(3)#11 | 74.71(15)  |
| O(2)-Li(1)-O(3)#2   | 122.7(5)   | O(2)#11-Na(2)-O(3)#11 | 56.26(13)  |
| O(1)#1-Li(1)-O(3)#2 | 109.2(4)   | O(3)#12-Na(2)-O(3)#11 | 137.08(16) |
| O(2)-Li(1)-O(3)#3   | 108.8(4)   | O(3)#2-Na(2)-O(3)#11  | 68.30(10)  |
| O(1)#1-Li(1)-O(3)#3 | 96.9(4)    | O(1)#3-Na(2)-O(3)#10  | 149.53(12) |
| O(3)#2-Li(1)-O(3)#3 | 100.4(5)   | O(1)-Na(2)-O(3)#10    | 75.72(13)  |
| O(2)#7-Na(1)-O(2)   | 83.2(2)    | O(2)#10-Na(2)-O(3)#10 | 56.26(13)  |
| O(2)#7-Na(1)-O(1)#4 | 139.2(2)   | O(2)#11-Na(2)-O(3)#10 | 74.71(15)  |
| O(2)-Na(1)-O(1)#4   | 82.63(15)  | O(3)#12-Na(2)-O(3)#10 | 68.30(10)  |
| O(2)#7-Na(1)-O(1)#8 | 82.63(15)  | O(3)#2-Na(2)-O(3)#10  | 137.08(16) |
| O(2)-Na(1)-O(1)#8   | 139.2(2)   | O(3)#11-Na(2)-O(3)#10 | 106.88(19) |
| O(1)#4-Na(1)-O(1)#8 | 83.6(2)    | O(1)-P(1)-O(2)        | 113.0(2)   |
| O(2)#7-Na(1)-O(4)#1 | 100.39(16) | O(1)-P(1)-O(3)        | 113.5(2)   |
| O(2)-Na(1)-O(4)#1   | 100.39(16) | O(2)-P(1)-O(3)        | 112.5(2)   |
| O(1)#4-Na(1)-O(4)#1 | 119.77(16) | O(1)-P(1)-O(4)        | 107.4(2)   |
| O(1)#8-Na(1)-O(4)#1 | 119.77(16) | O(2)-P(1)-O(4)        | 106.7(2)   |
| O(2)#7-Na(1)-O(4)   | 55.58(14)  | O(3)-P(1)-O(4)        | 102.8(2)   |
| O(2)-Na(1)-O(4)     | 55.58(14)  |                       |            |

#1  $x, y+1/2, z-1/2$  #2  $x, y+1/2, z+1/2$   
#3  $-x+1, -y+1, z$  #4  $x, y, z-1$  #5  $-x+1, -y+3/2, z+1/2$   
#6  $-x+1, -y+3/2, z-1/2$  #7  $-x+3/2, y, z$   
#8  $-x+3/2, y, z-1$  #9  $x+1/2, -y+1, z-1$

#10  $x, y, z+1$     #11  $-x+1, -y+1, z+1$     #12  $-x+1, -y+1/2, z+1/2$   
#13  $x, y-1/2, z+1/2$     #14  $x, y-1/2, z-1/2$



**Table S3b.** Selected bond distances (Å) and angles (deg) for  $\text{Li}_8\text{Pb}_3\text{Ba}(\text{P}_2\text{O}_7)_4$ .

|               |           |                       |            |
|---------------|-----------|-----------------------|------------|
| Pb(1)-O(12)   | 2.416(7)  | O(7)#5-Ba(1)-O(12)    | 94.59(19)  |
| Pb(1)-O(12)#1 | 2.416(7)  | O(7)#4-Ba(1)-O(12)    | 161.61(19) |
| Pb(1)-O(9)#1  | 2.498(7)  | O(1)#4-Ba(1)-O(12)#1  | 108.2(2)   |
| Pb(1)-O(9)    | 2.498(7)  | O(1)#5-Ba(1)-O(12)#1  | 115.8(2)   |
| Pb(2)-O(6)#2  | 2.491(7)  | O(7)#5-Ba(1)-O(12)#1  | 161.61(19) |
| Pb(2)-O(14)   | 2.530(7)  | O(7)#4-Ba(1)-O(12)#1  | 94.59(19)  |
| Pb(2)-O(4)    | 2.542(7)  | O(12)-Ba(1)-O(12)#1   | 67.0(3)    |
| Pb(2)-O(13)#2 | 2.662(7)  | O(1)#4-Ba(1)-O(10)#1  | 59.52(19)  |
| Pb(1)-O(5)    | 2.774(8)  | O(1)#5-Ba(1)-O(10)#1  | 133.3(2)   |
| Pb(1)-O(5)#1  | 2.873(7)  | O(7)#5-Ba(1)-O(10)#1  | 68.64(19)  |
| Pb(1)-O(3)    | 2.873(7)  | O(7)#4-Ba(1)-O(10)#1  | 127.60(19) |
| Pb(1)-O(3)#1  | 2.774(8)  | O(12)-Ba(1)-O(10)#1   | 59.08(18)  |
| Ba(1)-O(1)#4  | 2.672(7)  | O(12)#1-Ba(1)-O(10)#1 | 100.45(18) |
| Ba(1)-O(1)#5  | 2.672(7)  | O(1)#4-Ba(1)-O(10)    | 133.3(2)   |
| Ba(1)-O(7)#5  | 2.881(8)  | O(1)#5-Ba(1)-O(10)    | 59.52(19)  |
| Ba(1)-O(7)#4  | 2.881(7)  | O(7)#5-Ba(1)-O(10)    | 127.60(19) |
| Ba(1)-O(12)   | 2.937(7)  | O(7)#4-Ba(1)-O(10)    | 68.64(19)  |
| Ba(1)-O(12)#1 | 2.937(7)  | O(12)-Ba(1)-O(10)     | 100.45(18) |
| Ba(1)-O(10)#1 | 3.148(7)  | O(12)#1-Ba(1)-O(10)   | 59.08(18)  |
| Ba(1)-O(10)   | 3.148(7)  | O(10)#1-Ba(1)-O(10)   | 157.0(2)   |
| P(1)-O(7)     | 1.505(8)  | O(7)-P(1)-O(5)        | 112.6(4)   |
| P(1)-O(5)     | 1.517(7)  | O(7)-P(1)-O(9)        | 114.8(4)   |
| P(1)-O(9)     | 1.518(7)  | O(5)-P(1)-O(9)        | 112.0(4)   |
| P(1)-O(3)     | 1.637(7)  | O(7)-P(1)-O(3)        | 107.6(4)   |
| P(2)-O(11)    | 1.513(7)  | O(5)-P(1)-O(3)        | 103.5(4)   |
| P(2)-O(13)    | 1.514(7)  | O(9)-P(1)-O(3)        | 105.2(4)   |
| P(2)-O(4)     | 1.516(7)  | O(11)-P(2)-O(13)      | 115.3(4)   |
| P(2)-O(2)     | 1.613(7)  | O(11)-P(2)-O(4)       | 111.7(4)   |
| P(3)-O(1)     | 1.499(7)  | O(13)-P(2)-O(4)       | 112.1(4)   |
| P(3)-O(8)     | 1.509(7)  | O(11)-P(2)-O(2)       | 104.4(4)   |
| P(3)-O(12)    | 1.531(7)  | O(13)-P(2)-O(2)       | 106.6(4)   |
| P(3)-O(3)     | 1.625(7)  | O(4)-P(2)-O(2)        | 105.9(4)   |
| P(4)-O(10)    | 1.511(7)  | O(1)-P(3)-O(8)        | 115.9(4)   |
| P(4)-O(14)    | 1.518(8)  | O(1)-P(3)-O(12)       | 110.4(4)   |
| P(4)-O(6)     | 1.524(7)  | O(8)-P(3)-O(12)       | 112.4(4)   |
| P(4)-O(2)     | 1.620(7)  | O(1)-P(3)-O(3)        | 106.8(4)   |
| Li(1)-O(1)    | 1.925(18) | O(8)-P(3)-O(3)        | 104.5(4)   |
| Li(1)-O(10)#5 | 1.938(18) | O(12)-P(3)-O(3)       | 106.1(4)   |
| Li(1)-O(7)#5  | 1.964(19) | O(10)-P(4)-O(14)      | 113.8(4)   |
| Li(1)-O(6)#1  | 1.968(19) | O(10)-P(4)-O(6)       | 112.6(4)   |
| Li(2)-O(5)    | 1.96(2)   | O(14)-P(4)-O(6)       | 112.3(4)   |
| Li(2)-O(8)#9  | 2.00(2)   | O(10)-P(4)-O(2)       | 104.5(4)   |

|                      |           |                        |           |
|----------------------|-----------|------------------------|-----------|
| Li(2)-O(13)#7        | 2.003(19) | O(14)-P(4)-O(2)        | 105.9(4)  |
| Li(2)-O(11)#10       | 2.025(18) | O(6)-P(4)-O(2)         | 106.9(4)  |
| Li(3)-O(8)#9         | 1.930(18) | O(1)-Li(1)-O(10)#5     | 98.2(8)   |
| Li(3)-O(14)#11       | 1.961(19) | O(1)-Li(1)-O(7)#5      | 103.2(8)  |
| Li(3)-O(4)#7         | 1.996(19) | O(10)#5-Li(1)-O(7)#5   | 117.8(9)  |
| Li(3)-O(5)#12        | 2.022(19) | O(1)-Li(1)-O(6)#1      | 114.9(9)  |
| Li(3)-O(7)#12        | 2.555(19) | O(10)#5-Li(1)-O(6)#1   | 112.4(9)  |
| Li(4)-O(9)           | 1.871(18) | O(7)#5-Li(1)-O(6)#1    | 109.7(9)  |
| Li(4)-O(10)          | 1.905(19) | O(5)-Li(2)-O(8)#9      | 119.0(9)  |
| Li(4)-O(11)#7        | 1.918(18) | O(5)-Li(2)-O(13)#7     | 114.4(9)  |
| Li(4)-O(12)#1        | 1.964(18) | O(8)#9-Li(2)-O(13)#7   | 108.8(9)  |
| O(12)-Pb(1)-O(12)#1  | 84.3(3)   | O(5)-Li(2)-O(11)#10    | 106.5(9)  |
| O(12)-Pb(1)-O(9)#1   | 66.1(2)   | O(8)#9-Li(2)-O(11)#10  | 96.4(8)   |
| O(12)#1-Pb(1)-O(9)#1 | 73.7(2)   | O(13)#7-Li(2)-O(11)#10 | 110.0(9)  |
| O(12)-Pb(1)-O(9)     | 73.7(2)   | O(8)#9-Li(3)-O(14)#11  | 102.4(8)  |
| O(12)#1-Pb(1)-O(9)   | 66.1(2)   | O(8)#9-Li(3)-O(4)#7    | 100.8(8)  |
| O(9)#1-Pb(1)-O(9)    | 124.9(4)  | O(14)#11-Li(3)-O(4)#7  | 86.5(7)   |
| O(6)#2-Pb(2)-O(14)   | 80.6(2)   | O(8)#9-Li(3)-O(5)#12   | 108.1(8)  |
| O(6)#2-Pb(2)-O(4)    | 106.6(2)  | O(14)#11-Li(3)-O(5)#12 | 146.7(10) |
| O(14)-Pb(2)-O(4)     | 67.7(2)   | O(4)#7-Li(3)-O(5)#12   | 100.2(8)  |
| O(6)#2-Pb(2)-O(13)#2 | 75.0(2)   | O(8)#9-Li(3)-O(7)#12   | 118.8(8)  |
| O(14)-Pb(2)-O(13)#2  | 125.8(2)  | O(14)#11-Li(3)-O(7)#12 | 88.6(7)   |
| O(4)-Pb(2)-O(13)#2   | 74.2(2)   | O(4)#7-Li(3)-O(7)#12   | 140.3(8)  |
| O(1)#4-Ba(1)-O(1)#5  | 126.8(3)  | O(5)#12-Li(3)-O(7)#12  | 65.4(5)   |
| O(1)#4-Ba(1)-O(7)#5  | 79.7(2)   | O(9)-Li(4)-O(10)       | 106.2(9)  |
| O(1)#5-Ba(1)-O(7)#5  | 68.1(2)   | O(9)-Li(4)-O(11)#7     | 125.3(10) |
| O(1)#4-Ba(1)-O(7)#4  | 68.1(2)   | O(10)-Li(4)-O(11)#7    | 117.2(9)  |
| O(1)#5-Ba(1)-O(7)#4  | 79.7(2)   | O(9)-Li(4)-O(12)#1     | 88.6(8)   |
| O(7)#5-Ba(1)-O(7)#4  | 103.8(3)  | O(10)-Li(4)-O(12)#1    | 101.9(8)  |
| O(1)#4-Ba(1)-O(12)   | 115.8(2)  | O(11)#7-Li(4)-O(12)#1  | 111.8(9)  |
| O(1)#5-Ba(1)-O(12)   | 108.2(2)  |                        |           |

|                            |                            |
|----------------------------|----------------------------|
| #1 $-x+1/2, -y+1, z-1/2$   | #2 $x-1/2, y, -z+3/2$      |
| #3 $-x+1, -y+1, -z+1$      | #4 $-x+3/2, -y+1, z+1/2$   |
| #5 $-x+1, -y+1, -z+2$      | #6 $-x+1, y+1/2, -z+2$     |
| #7 $x-1/2, -y+3/2, -z+3/2$ | #8 $x+1/2, -y+3/2, -z+3/2$ |
| #9 $x+1/2, y, -z+3/2$      | #10 $x, -y+3/2, z$         |
| #11 $x, -y+1/2, z$         | #12 $-x+1/2, -y+1, z+1/2$  |
| #13 $-x+1, y-1/2, -z+1$    | #14 $-x+3/2, -y+1, z-1/2$  |

**Table S3c.** Selected bond distances (Å) and angles (deg) for Li<sub>7</sub>Rb(P<sub>2</sub>O<sub>7</sub>)<sub>2</sub>.

|               |           |                       |            |
|---------------|-----------|-----------------------|------------|
| Rb(1)-O(2)#1  | 2.989(4)  | O(1)#2-Rb(1)-O(1)#3   | 180        |
| Rb(1)-O(2)    | 2.989(4)  | O(2)#1-Rb(1)-O(5)#2   | 56.11(8)   |
| Rb(1)-O(1)    | 3.062(3)  | O(2)-Rb(1)-O(5)#2     | 123.89(8)  |
| Rb(1)-O(1)#1  | 3.062(3)  | O(1)-Rb(1)-O(5)#2     | 99.99(9)   |
| Rb(1)-O(6)#2  | 3.112(4)  | O(1)#1-Rb(1)-O(5)#2   | 80.01(9)   |
| Rb(1)-O(6)#3  | 3.112(4)  | O(6)#2-Rb(1)-O(5)#2   | 78.05(11)  |
| Rb(1)-O(1)#2  | 3.264(3)  | O(6)#3-Rb(1)-O(5)#2   | 101.95(11) |
| Rb(1)-O(1)#3  | 3.264(3)  | O(1)#2-Rb(1)-O(5)#2   | 43.91(8)   |
| Rb(1)-O(5)#2  | 3.418(4)  | O(1)#3-Rb(1)-O(5)#2   | 136.09(8)  |
| Rb(1)-O(5)#3  | 3.418(4)  | O(2)#1-Rb(1)-O(5)#3   | 123.89(8)  |
| Li(1)-O(5)#4  | 1.884(8)  | O(2)-Rb(1)-O(5)#3     | 56.11(8)   |
| Li(1)-O(2)    | 1.890(8)  | O(1)-Rb(1)-O(5)#3     | 80.01(9)   |
| Li(1)-O(6)#2  | 1.948(8)  | O(1)#1-Rb(1)-O(5)#3   | 99.99(9)   |
| Li(1)-O(2)#5  | 2.061(8)  | O(6)#2-Rb(1)-O(5)#3   | 101.95(11) |
| Li(2)-O(7)    | 1.855(16) | O(6)#3-Rb(1)-O(5)#3   | 78.05(11)  |
| Li(2)-O(4)#7  | 1.971(14) | O(1)#2-Rb(1)-O(5)#3   | 136.09(8)  |
| Li(2)-O(7)#8  | 2.018(16) | O(1)#3-Rb(1)-O(5)#3   | 43.91(8)   |
| Li(2)-O(3)#3  | 2.025(17) | O(5)#2-Rb(1)-O(5)#3   | 180        |
| Li(3)-O(3)    | 1.839(15) | O(5)#4-Li(1)-O(2)     | 132.0(4)   |
| Li(3)-O(4)#11 | 1.917(15) | O(5)#4-Li(1)-O(6)#2   | 101.6(4)   |
| Li(3)-O(4)#10 | 2.149(15) | O(2)-Li(1)-O(6)#2     | 114.3(4)   |
| Li(3)-O(3)#11 | 2.430(17) | O(5)#4-Li(1)-O(2)#5   | 100.6(3)   |
| Li(3)-O(7)#10 | 2.522(18) | O(2)-Li(1)-O(2)#5     | 93.0(3)    |
| Li(4)-O(4)    | 1.886(13) | O(6)#2-Li(1)-O(2)#5   | 114.1(4)   |
| Li(4)-O(3)#7  | 1.912(13) | O(7)-Li(2)-O(4)#7     | 101.2(7)   |
| Li(4)-O(5)#3  | 1.994(14) | O(7)-Li(2)-O(7)#8     | 96.2(7)    |
| Li(4)-O(3)#3  | 2.079(14) | O(4)#7-Li(2)-O(7)#8   | 124.7(8)   |
| Li(5)-O(7)#8  | 1.902(15) | O(7)-Li(2)-O(3)#3     | 115.7(8)   |
| Li(5)-O(6)#13 | 1.954(16) | O(4)#7-Li(2)-O(3)#3   | 110.8(8)   |
| Li(5)-O(7)    | 2.008(14) | O(7)#8-Li(2)-O(3)#3   | 107.7(7)   |
| Li(5)-O(4)#7  | 2.084(16) | O(3)-Li(3)-O(4)#11    | 122.3(8)   |
| Li(6)-O(5)#3  | 1.931(15) | O(3)-Li(3)-O(4)#10    | 132.7(8)   |
| Li(6)-O(4)    | 1.974(16) | O(4)#11-Li(3)-O(4)#10 | 103.9(7)   |
| Li(6)-O(3)#7  | 2.021(16) | O(3)-Li(3)-O(3)#11    | 84.0(6)    |
| Li(6)-O(6)#14 | 2.085(16) | O(4)#11-Li(3)-O(3)#11 | 90.4(6)    |
| P(1)-O(6)     | 1.504(3)  | O(4)#10-Li(3)-O(3)#11 | 86.2(6)    |
| P(1)-O(7)     | 1.506(3)  | O(3)-Li(3)-O(7)#10    | 96.6(7)    |
| P(1)-O(3)     | 1.524(3)  | O(4)#11-Li(3)-O(7)#10 | 82.3(6)    |
| P(1)-O(1)     | 1.631(3)  | O(4)#10-Li(3)-O(7)#10 | 99.2(6)    |
| P(2)-O(5)     | 1.504(3)  | O(3)#11-Li(3)-O(7)#10 | 171.8(7)   |
| P(2)-O(2)     | 1.505(3)  | O(4)-Li(4)-O(3)#7     | 111.3(6)   |
| P(2)-O(4)     | 1.525(3)  | O(4)-Li(4)-O(5)#3     | 106.9(6)   |

|                     |            |                      |            |
|---------------------|------------|----------------------|------------|
| P(2)-O(1)           | 1.626(3)   | O(3)#7-Li(4)-O(5)#3  | 114.7(7)   |
| O(2)#1-Rb(1)-O(2)   | 180        | O(4)-Li(4)-O(3)#3    | 134.4(7)   |
| O(2)#1-Rb(1)-O(1)   | 131.62(8)  | O(3)#7-Li(4)-O(3)#3  | 92.7(6)    |
| O(2)-Rb(1)-O(1)     | 48.38(8)   | O(5)#3-Li(4)-O(3)#3  | 96.2(6)    |
| O(2)#1-Rb(1)-O(1)#1 | 48.38(8)   | O(7)#8-Li(5)-O(6)#13 | 117.0(8)   |
| O(2)-Rb(1)-O(1)#1   | 131.62(8)  | O(7)#8-Li(5)-O(7)    | 95.0(6)    |
| O(1)-Rb(1)-O(1)#1   | 180        | O(6)#13-Li(5)-O(7)   | 121.4(8)   |
| O(2)#1-Rb(1)-O(6)#2 | 116.24(10) | O(7)#8-Li(5)-O(4)#7  | 124.8(8)   |
| O(2)-Rb(1)-O(6)#2   | 63.76(10)  | O(6)#13-Li(5)-O(4)#7 | 104.4(6)   |
| O(1)-Rb(1)-O(6)#2   | 94.63(9)   | O(7)-Li(5)-O(4)#7    | 92.6(6)    |
| O(1)#1-Rb(1)-O(6)#2 | 85.37(9)   | O(5)#3-Li(6)-O(4)    | 105.9(7)   |
| O(2)#1-Rb(1)-O(6)#3 | 63.76(10)  | O(5)#3-Li(6)-O(3)#7  | 112.6(8)   |
| O(2)-Rb(1)-O(6)#3   | 116.24(10) | O(4)-Li(6)-O(3)#7    | 103.4(7)   |
| O(1)-Rb(1)-O(6)#3   | 85.37(9)   | O(5)#3-Li(6)-O(6)#14 | 95.3(6)    |
| O(1)#1-Rb(1)-O(6)#3 | 94.63(9)   | O(4)-Li(6)-O(6)#14   | 103.7(7)   |
| O(6)#2-Rb(1)-O(6)#3 | 180        | O(3)#7-Li(6)-O(6)#14 | 133.4(8)   |
| O(2)#1-Rb(1)-O(1)#2 | 99.43(8)   | O(6)-P(1)-O(7)       | 114.2(2)   |
| O(2)-Rb(1)-O(1)#2   | 80.57(8)   | O(6)-P(1)-O(3)       | 112.64(18) |
| O(1)-Rb(1)-O(1)#2   | 75.55(10)  | O(7)-P(1)-O(3)       | 111.46(18) |
| O(1)#1-Rb(1)-O(1)#2 | 104.45(10) | O(6)-P(1)-O(1)       | 104.47(17) |
| O(6)#2-Rb(1)-O(1)#2 | 45.68(8)   | O(7)-P(1)-O(1)       | 106.37(18) |
| O(6)#3-Rb(1)-O(1)#2 | 134.32(8)  | O(3)-P(1)-O(1)       | 107.01(17) |
| O(2)#1-Rb(1)-O(1)#3 | 80.57(8)   | O(5)-P(2)-O(2)       | 115.03(18) |
| O(2)-Rb(1)-O(1)#3   | 99.43(8)   | O(5)-P(2)-O(4)       | 112.18(17) |
| O(1)-Rb(1)-O(1)#3   | 104.45(10) | O(2)-P(2)-O(4)       | 111.50(18) |
| O(1)#1-Rb(1)-O(1)#3 | 75.55(10)  | O(5)-P(2)-O(1)       | 106.09(18) |
| O(6)#2-Rb(1)-O(1)#3 | 134.32(8)  | O(2)-P(2)-O(1)       | 104.75(16) |
| O(6)#3-Rb(1)-O(1)#3 | 45.68(8)   | O(4)-P(2)-O(1)       | 106.48(16) |

#1 -x+2,-y+1,-z+1    #2 -x+1,-y+1,-z+1  
 #3 x+1,y,z    #4 -x+1,-y+2,-z+1    #5 -x+2,-y+2,-z+1  
 #6 x+1,y+1,z+1    #7 -x+1,-y+1,-z    #8 -x+1,-y,-z  
 #9 -x+2,-y+1,-z    #10 x-1,y,z    #11 -x,-y+1,-z  
 #12 -x-1,-y+1,-z    #13 -x,-y,-z    #14 x+1,y+1,z  
 #15 x,y+1,z    #16 x-1,y-1,z

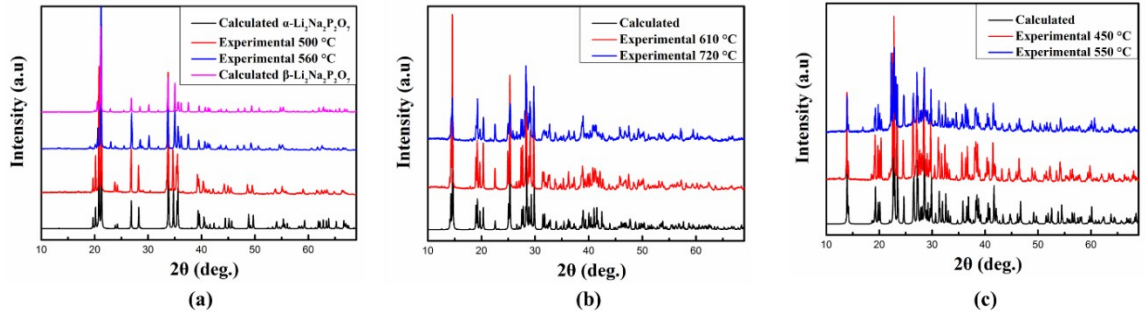

**Fig. S1.** Experimental and calculated XRD patterns of (a)  $\alpha$ - $\text{Li}_2\text{Na}_2\text{P}_2\text{O}_7$ , (b)  $\text{Li}_8\text{Pb}_3\text{Ba}(\text{P}_2\text{O}_7)_4$ , and (c)  $\text{Li}_7\text{Rb}(\text{P}_2\text{O}_7)_2$ .

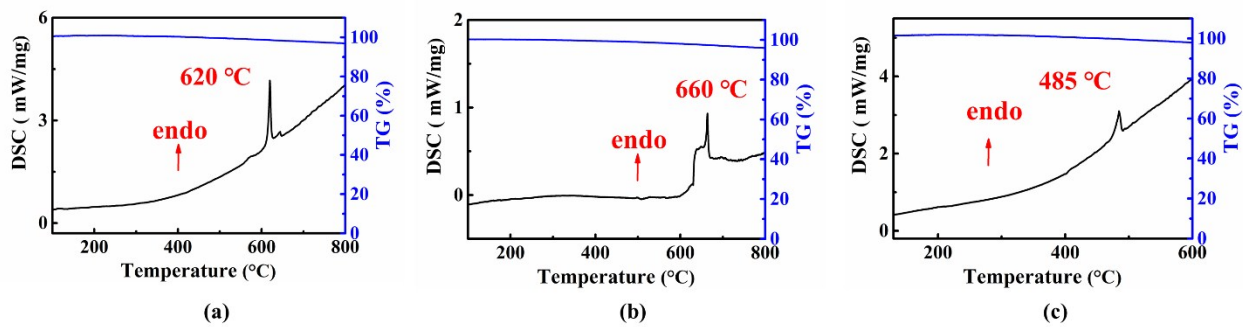

**Fig. S2.** TG-DSC curves of (a)  $\alpha$ - $\text{Li}_2\text{Na}_2\text{P}_2\text{O}_7$ , (b)  $\text{Li}_8\text{Pb}_3\text{Ba}(\text{P}_2\text{O}_7)_4$ , and (c)  $\text{Li}_7\text{Rb}(\text{P}_2\text{O}_7)_2$ .

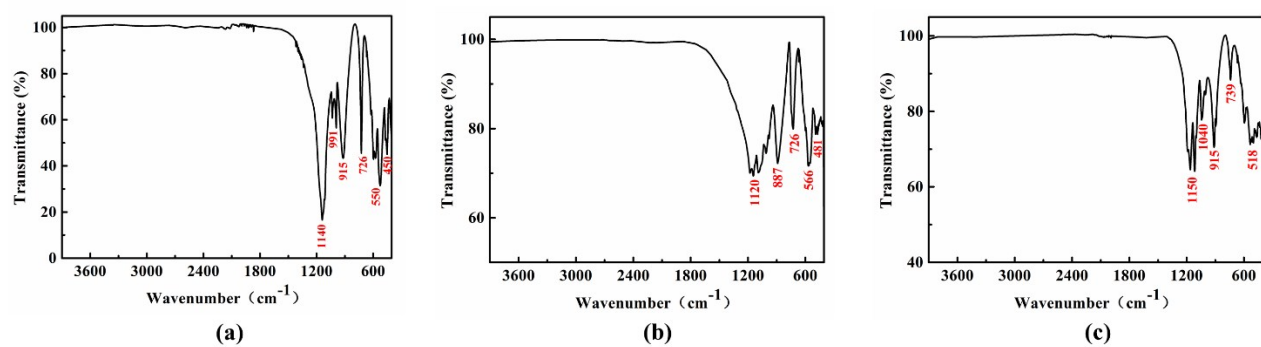

**Fig. S3.** IR spectra of (a)  $\alpha\text{-Li}_2\text{Na}_2\text{P}_2\text{O}_7$ , (b)  $\text{Li}_8\text{Pb}_3\text{Ba}(\text{P}_2\text{O}_7)_4$ , and (c)  $\text{Li}_7\text{Rb}(\text{P}_2\text{O}_7)_2$ .

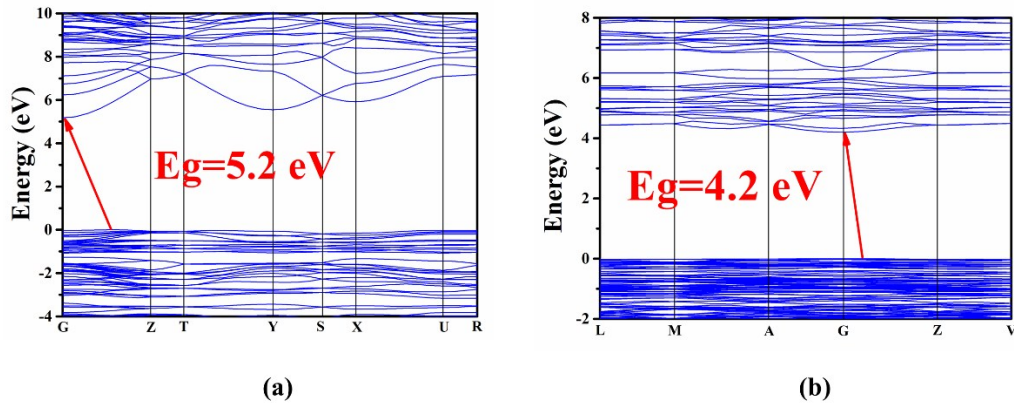

**Fig. S4.** Band structures of (a)  $\alpha\text{-Li}_2\text{Na}_2\text{P}_2\text{O}_7$ , and (b)  $\text{Li}_8\text{Pb}_3\text{Ba}(\text{P}_2\text{O}_7)_4$ .



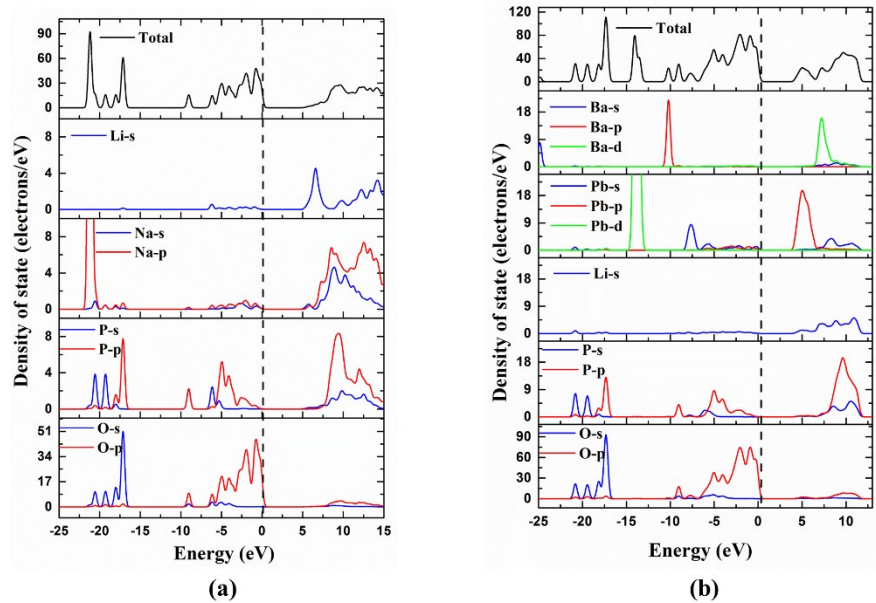

**Fig. S5.** Projected density of states of (a)  $\alpha$ -Li<sub>2</sub>Na<sub>2</sub>P<sub>2</sub>O<sub>7</sub>, and (b) Li<sub>8</sub>Pb<sub>3</sub>Ba(P<sub>2</sub>O<sub>7</sub>)<sub>4</sub>.
